# Supplementary material
Source: publisher figshare collection journal article supplement (https://acs.figshare.com/ndownloader/files/9103585)
Supplement: Supplementary file 1 [file 9103585]

Compound	SMILES	Cal 1 Ki [nM]
1	O=C(C(N)=O)C(CC1=CC=CC=C1)NC(C2=CC=CC=C2/C=C/C3=CC=C(CN(CC)CC)C=C3)=O	56
2	O=C(NC(C(C(N)=O)=O)CC1=CC=CC=C1)C2=CC=CN=C2/C=C/C(C=C3)=CC=C3CN(CC)CC	109
3	O=C(NC(CC1=CC=CC=C1)C(C(N)=O)=O)C2=C(N3CCN(C4=CC=CC=C4)CC3)N=CC=C2	250
4	O=C(C(N)=O)C(CC1=CC=CC=C1)NC(C2=CC=CN=C2N3CC(C4=CC=CC=C4)CC3)=O	125
17	O=C(NC(C(C(N)=O)=O)CC1=CC=CC=C1)C2=C(N=CC=C2)N(C=N3)C=C3C4=CC=CC=C4	45
18	O=C(NC(C(C(N)=O)=O)CC1=CC=CC=C1)C2=C(N=CC=C2)N(N=C3)C=C3C4=CC=CC=C4	21
19	O=C(NC(C(C(N)=O)=O)CC1=CC=CC=C1)C2=C(N=CC=C2)N(C=C3)N=C3C4=CC=CC=C4	18
20	O=C(NC(CC1=CC=CC=C1)C(C(N)=O)=O)C2=CC=CN=C2C3=CSC(C4=CC=CC=C4)=N3	38
21	O=C(NC(CC1=CC=CC=C1)C(C(N)=O)=O)C2=CC=CN=C2C3=COC(C4=CC=CC=C4)=N3	177
22	O=C(C(N)=O)C(CC1=CC=CC=C1)NC(C2=CC=CC=C2C3=CSC(C4=CC=CC=C4)=N3)=O	234
23	O=C(C(N)=O)C(CC1=CC=CC=C1)NC(C2=CC=CC=C2N3N=C(C4=CC=CC=C4)C=C3)=O	43
24	O=C(C1=C(C=CC=C1)N2N=C(C3=CC=CC=C3)C=C2)NC(C(C(N)=O)=O)CC4=CC=CC=C4	82
25	O=C(NC(CCCC)C(C(N)=O)=O)C1=CC=CN=C1N2C=C(C3=CC=CC=C3)N=C2	38
26	O=C(NC(CCCC)C(C(N)=O)=O)C1=CC=CN=C1N2C=C(C3=CC=CC=C3)C=N2	20
27	O=C(NC(CCCC)C(C(N)=O)=O)C1=CC=CN=C1N2N=C(C3=CC=CC=C3)C=C2	32
28	O=C(NC(CCCC)C(C(N)=O)=O)C1=CC=CN=C1C2=CSC(C3=CC=CC=C3)=N2	122
29	O=C(C(N)=O)C(NC(C1=CC=CN=C1N2N=CC=C2)=O)CC3=CC=CC=C3	164
30	O=C(NC(C(C(N)=O)=O)CC1=CC=CC=C1)C2=CC=CN=C2N3N=C(C4CCCCC4)C=C3	56
31	O=C(NC(C(C(N)=O)=O)CC1=CC=CC=C1)C2=CC=CN=C2N3N=C(C(C)(C)C)C=C3	81
32	O=C(NC(CC1=CC=CC=C1)C(C(N)=O)=O)C2=CC=CN=C2N3N=C(C4CC4)C=C3	94
33	O=C(NC(C(C(N)=O)=O)CC1=CC=CC=C1)C2=CC=CN=C2N3N=C(C4CCOCC4)C=C3	48
34	O=C(NC(CC1=CC=CC=C1)C(C(N)=O)=O)C2=CC=CN=C2N3C=CC(C4CCN(C)CC4)=N3	146
35	O=C(NC(C(C(N)=O)=O)CC1=CC=CC=C1)C2=CC=CN=C2N3N=C(CC4=CC=CC=C4)C=C3	38
36	O=C(C1=C(N2N=C(CCCC3)C3=C2)N=CC=C1)NC(CC4=CC=CC=C4)C(C(N)=O)=O	101
37	O=C(NC(C(C(N)=O)=O)CC1=CC=CC=C1)C2=CC=CN=C2N3N=C(C4=CC=C(Cl)C=C4)C=C3	88
38	O=C(NC(C(C(N)=O)=O)CC1=CC=CC=C1)C2=CC=CN=C2N3N=C(C4=CC=C(F)C=C4)C=C3	34
39	O=C(NC(C(C(N)=O)=O)CC1=CC=CC=C1)C2=CC=CN=C2N3N=C(C4=CC=C(OC)C=C4)C=C3	83
40	O=C(NC(C(C(N)=O)=O)CC1=CC=CC=C1)C2=CC=CN=C2N3N=C(C4=CC=C(C(F)(F)F)C=C4)C=C3	72
41	O=C(NC(C(C(N)=O)=O)CC1=CC=CC=C1)C2=CC=CN=C2N3N=C(C4=CC=CC(C(F)(F)F)=C4)C=C3	40
42	O=C(NC(C(C(N)=O)=O)CC1=CC=CC=C1)C2=CC=CN=C2N3N=C(C4=CC=C(CN(CC)CC)C=C4)C=C3	100
43	O=C(NC(C(C(N)=O)=O)CC1=CC=CC=C1)C2=CC=CN=C2N3N=C(C4=CC=C(CN5CCOCC5)C=C4)C=C3	41
44	O=C(C(N)=O)C(CC1=CC=CC=C1)NC(C2=CC=CN=C2N3N=C(C=CC=C4)C4=C3)=O	46
45	O=C(C(N)=O)C(CC1=CC=CC=C1)NC(C2=CC=CN=C2N3N=C(C(C=CC=C4)=C4OC5)C5=C3)=O	8
